# Supplementary material for: Expression of thermophilic two-domain laccase from Catenuloplanes japonicus in Escherichia coli and its activity against triarylmethane and azo dyes
Source: PeerJ. 2021 Jun 24;9:e11646. doi: 10.7717/peerj.11646 (PMC8236229; doi:10.7717/peerj.11646)
Supplement: Supplemental Information 2 [file peerj-09-11646-s002.xlsx]

## Sheet: Properties
	Optimal temperature					pH optimum ABTS						pH optimum2.6-DMP						Inhibition NaCl							Inhibition NaN3
	Temperature, °C	dA/min/ml	dA/min/ml	dA/min/ml		pН	dA/min/ml	dA/min/ml	dA/min/ml	dA/min/ml		рН	dA/min/ml	dA/min/ml	dA/min/ml	dA/min/ml		pH 3.6	dA/min/ml	dA/min/ml	dA/min/ml	dA/min/ml	dA/min/ml		pH 3.6	dA/min/ml	dA/min/ml	dA/min/ml	dA/min/ml	dA/min/ml
	30	0.2453	0.2596	0.2469		3	0.0357	0.0398	0.0406	0.0374		8	0.0345	0.0369	0.0335	0.0336		Control	1.1462	1.1476	1.1533	1.1685	1.1543		Control	1.1616	1.1589	1.168	1.1712	1.1541
	40	0.4465	0.4513	0.4565		3.4	0.9843	1.0164	0.992			8.5	0.0875	0.0867	0.087			1 mM	0.7906	0.7959	0.7715	0.7923			1 mM	0.4645	0.4552	0.4433	0.451
	50	0.6669	0.6651	0.6653		3.6	1.0853	1.1053	1.1021	1.091		9	0.1649	0.1666	0.1564	0.1558		10 mM	0.3161	0.2981	0.2942	0.3057			10 mM	0.0128	0.0143	0.0162
	60	0.7914	0.7836	0.7814		3.8	0.8949	0.9113	0.938			9.2	0.1801	0.1774	0.1836	0.1805		100 mM	0.0568	0.0393	0.0445	0.0427			100 mM	0
	70	0.8449	0.846	0.8398		4.1	0.6862	0.6818	0.6875	0.6851		9.4	0.1756	0.1783	0.1759	0.1731		pH 9.2	dA/min/ml	dA/min/ml	dA/min/ml	dA/min/ml	dA/min/ml		pH 9.2	dA/min/ml	dA/min/ml	dA/min/ml	dA/min/ml	dA/min/ml
	80	0.7817	0.7854	0.7724		4.5	0.3607	0.3745	0.3698	0.3706		9.6	0.1703	0.1604	0.1694	0.1706		Control	0.3672	0.3689	0.3779	0.375	0.381		Control	0.3854	0.3887	0.3847
	90	0.6816	0.74	0.7136		5	0.1267	0.1394	0.1305	0.132		9.8	0.154	0.1578	0.1457	0.1513		1 mM	0.366	0.3643	0.3628				1 mM	0.3986	0.3887	0.3988
						5.5	0.068	0.0685	0.0684	0.0657		10	0.1293	0.1346	0.1318	0.1274		10 mM	0.3684	0.3689	0.3695				10 mM	0.4145	0.4107	0.4057	0.3977
												10.5	0.0712	0.0675	0.0691			100 mM	0.3608	0.3559	0.3555				100 mM	0.2835	0.2943	0.2839	0.2896
	pH stability
	pH		dA/min/ml	dA/min/ml	dA/min/ml	dA/min/ml	dA/min/ml		Thermal stability
	3	Control	0.4678	0.4394	0.4543	0.4435			80°С	dA/min/ml	dA/min/ml	dA/min/ml	dA/min/ml	dA/min/ml	dA/min/ml			Inhibition NaF							Inhibition EDTA
		24 h	0.0716	0.0779	0.0716	0.0668	0.0621		0 min	0.9747	0.994	1.0082	1.0238					pH 3.6	dA/min/ml	dA/min/ml	dA/min/ml				pH 3.6	dA/min/ml	dA/min/ml	dA/min/ml	dA/min/ml
		120 h	0						10 min	0.846	0.8632	0.8448						Control	1.7281	1.7491	1.7323				Control	1.7236	1.7331	1.726
		360 h	0						20 min	0.7238	0.7481	0.7454	0.73	0.7706				1 mM	1.3425	1.353	1.3502				1 mM	1.7473	1.7333	1.7277
	5	Control	0.5523	0.5666	0.5777	0.5633			30 min	0.7135	0.7239	0.6946	0.7294	0.6954	0.7202			10 mM	0.5651	0.5614	0.5625				10 mM	1.4903	1.5125	1.4893	1.5028
		24 h	0.5584	0.5615	0.5785	0.5547			40 min	0.6792	0.6711	0.6721	0.6673					100 mM	0.0142	0.0151	0.0158				100 mM	0.8774	0.8766	0.8785
		120 h	0.4247	0.4293	0.4241				50 min	0.655	0.6666	0.6512						pH 9.2	dA/min/ml	dA/min/ml	dA/min/ml				pH 9.2	dA/min/ml	dA/min/ml	dA/min/ml	dA/min/ml
		360 h	0.3727	0.3813	0.3812				60 min	0.6459	0.6526	0.6109	0.6189					Control	0.2691	0.2677	0.2688				Control	0.2694	0.266	0.2666
	7	Control	0.5562	0.5572	0.5493	0.5589	0.541		90°С									1 mM	0.2653	0.2643	0.2669	0.2672			1 mM	0.2256	0.2263	0.2252
		24 h	0.5148	0.5056	0.5049				0 min	1.0743	1.0794	1.0756						10 mM	0.2676	0.2684	0.2711	0.2716	0.2731		10 mM	0.0228	0.0236	0.0242
		120 h	0.3901	0.3809	0.3675	0.3646	0.3725		10 min	0.8115	0.8248	0.8005	0.8373					100 mM	0.2853	0.284	0.2808				100 mM	0
		360 h	0.3367	0.3376	0.3316				20 min	0.7225	0.7185	0.7332	0.7282
	9	Control	0.5697	0.5599	0.564				30 min	0.6609	0.6655	0.6669
		24 h	0.4918	0.4856	0.5105	0.5045	0.5087		40 min	0.6087	0.6027	0.6008						Inhibition 1.10-phenantroline
		120 h	0.4002	0.4193	0.4106	0.4136			50 min	0.5929	0.5883	0.5991	0.5999					pH 3.6	dA/min/ml	dA/min/ml	dA/min/ml	dA/min/ml	dA/min/ml
		360 h	0.3283	0.3191	0.3164				60 min	0.5737	0.578	0.5718	0.5796					Control	1.6037	1.6033	1.6331	1.6331	1.5977
	11	Control	0.5476	0.5555	0.556	0.5384			100°С									1 mM	1.0065	0.987	1.0008	1.0101
		24 h	0.4925	0.515	0.5204	0.5145	0.5004		0 min	0.9556	0.9561	0.959						10 mM	0.0405	0.041	0.0397	0.0378
		120 h	0.3563	0.3686	0.3638				10 min	0.7219	0.7282	0.7232						100 mM	0
		360 h	0.1769	0.1707	0.1679				20 min	0.5909	0.5978	0.5905						pH 9.2	dA/min/ml	dA/min/ml	dA/min/ml
									30 min	0.5041	0.4946	0.4961	0.5016					Control	0.0877	0.0897	0.0888
									40 min	0.4109	0.4258	0.4318	0.4306					1 mM	0.0755	0.0755	0.0741
									50 min	0.2905	0.2888	0.304						10 mM	0.0497	0.0495	0.049
									60 min	0.2524	0.2534	0.2606						100 mM	-
	Dye decolorization
	Brilliant Green (λmax=623 nm (pH 4.0))					Methyl Orange (λmax= 478 nm (pH 4.0))					Methyl Orange (λmax= 464 nm (pH 6.5))					Methyl Orange (λmax= 464 nm (pH 9.2))
		Extinction	Extinction	Extinction			Extinction	Extinction	Extinction			Extinction	Extinction	Extinction			Extinction	Extinction	Extinction
	Control	1.658	1.674	1.68		Control	1.249	1.244	1.239		Control	1.039	1.037	1.046		Control	1.374	1.375	1.374
	Enzyme	1.645	1.678	1.664		Enzyme	1.194	1.192	1.165		Enzyme	1.014	1.018	1.014		Enzyme	1.339	1.34	1.344
	Control+ABTS	1.708	1.728	1.713		Control+ABTS	1.233	1.236	1.241		Control+ABTS	1.034	1.038	1.033		Control+ABTS	1.365	1.365	1.372
	Control+Syringaldehyde	1.715	1.705	1.712		Control+Syringaldehyde	1.237	1.234	1.218		Control+Syringaldehyde	1.036	1.037	1.036		Control+Syringaldehyde	1.37	1.37	1.37
	Enzyme+ABTS	0.141	0.147	0.14		Enzyme+ABTS	0.542	0.502	0.541		Enzyme+ABTS	0.958	0.966	0.959		Enzyme+ABTS	1.322	1.324	1.326
	Enzyme+Syringaldehyde	1.633	1.638	1.64		Enzyme+Syringaldehyde	1.155	1.152	1.164		Enzyme+Syringaldehyde	0.997	0.999	0.995		Enzyme+Syringaldehyde	1.339	1.334	1.345
	Malachite Green (λmax=617 nm (pH 4.0))					Methyl Red (λmax= 524 nm (pH 4.0))					Methyl Red (λmax= 524 nm (6.5))					Methyl Red (λmax= 432 nm (pH 9.2))
		Extinction	Extinction	Extinction			Extinction	Extinction	Extinction			Extinction	Extinction	Extinction			Extinction	Extinction	Extinction
	Control	2.286	2.32	2.315		Control	0.707	0.714	0.716		Control	0.694	0.698	0.692		Control	0.677	0.682	0.662
	Enzyme	2.29	2.263	2.286		Enzyme	0.683	0.688	0.695		Enzyme	0.669	0.681	0.66		Enzyme	0.641	0.649	0.652
	Control+ABTS	2.176	2.168	2.17		Control+ABTS	0.713	0.704	0.703		Control+ABTS	0.733	0.723	0.732		Control+ABTS	0.668	0.669	0.674
	Control+Syringaldehyde	2.319	2.317	2.297		Control+Syringaldehyde	0.73	0.73	0.731		Control+Syringaldehyde	0.69	0.712	0.713		Control+Syringaldehyde	0.675	0.684	0.681
	Enzyme+ABTS	1.655	1.641	1.662		Enzyme+ABTS	0.627	0.616	0.623		Enzyme+ABTS	0.415	0.394	0.406		Enzyme+ABTS	0.604	0.598	0.604
	Enzyme+Syringaldehyde	2.269	2.285	2.289		Enzyme+Syringaldehyde	0.672	0.671	0.671		Enzyme+Syringaldehyde	0.614	0.587	0.587		Enzyme+Syringaldehyde	0.62	0.609	0.612
						Congo Red (λmax= 570 nm (pH 4.0))					Congo Red (λmax= 488 nm (pH 6.5))					Congo Red (λmax= 488 nm (9.2))
							Extinction	Extinction	Extinction			Extinction	Extinction	Extinction			Extinction	Extinction	Extinction
						Control	0.527	0.57	0.557		Control	1.674	1.68	1.655		Control	1.673	1.689	1.689
						Enzyme	0.335	0.383	0.328		Enzyme	1.603	1.601	1.609		Enzyme	1.635	1.637	1.641
						Control+ABTS	0.571	0.494	0.543		Control+ABTS	1.677	1.679	1.693		Control+ABTS	1.687	1.689	1.688
						Control+Syringaldehyde	0.41	0.4	0.409		Control+Syringaldehyde	1.682	1.689	1.689		Control+Syringaldehyde	1.691	1.692	1.693
						Enzyme+ABTS	0.622	0.694	0.64		Enzyme+ABTS	1.158	1.158	1.176		Enzyme+ABTS	1.539	1.539	1.545
						Enzyme+Syringaldehyde	0.216	0.26	0.256		Enzyme+Syringaldehyde	1.315	1.303	1.318		Enzyme+Syringaldehyde	1.551	1.552	1.558

## Sheet: Kinetic data
		2.6-DMP Concentration	dA/min/ml	dA/min/ml	dA/min/ml	dA/min/ml		2.6-DMP, mM	U/mg		The amount of enzyme added			0,0051975 mg
		0,04 mM	0.016	0.0153	0.0156			0.04	0.0610302		Mr of gomotrimer			101400 Da
		0,07 mM	0.0269	0.0249	0.0254	0.0251		0.07	0.0980103
		0,1 mM	0.037	0.035	0.0345	0.0341		0.1	0.134732		Vmax	2.9327
		0,2 mM	0.066	0.0644	0.0651			0.2	0.254723		Km	1.8678
		0,5 mM	0.1617	0.1592	0.1589			0.5	0.62918
		1 mM	0.2652	0.2633	0.2647			1	1.03712
		2 mM	0.3899	0.3894	0.3836			2	1.51334
		3 mM	0.4672	0.4645	0.46			3	1.80466
		ɛ=49600 M−1 × cm−1
		ABTS Concentration	dA/min/ml	dA/min/ml	dA/min/ml	dA/min/ml	dA/min/ml		ABTS, mM	U/mg		The amount of enzyme added			0,00324 mg
		0,01 mM	0.0136	0.0127	0.0111	0.0111			0.01	0.103952		Mr of gomotrimer			101400 Da
		0,03 mM	0.0539	0.0522	0.0537				0.03	0.456676
		0,1 mM	0.2249	0.2124	0.2087	0.1976	0.2125		0.1	1.81087		Vmax	13.0987
		0,3 mM	0.7404	0.7936	0.7486	0.7332			0.3	6.46391		Km	0.3883
		0,6 mM	0.9872	0.9534	0.9576	0.9812			0.6	8.3149
		1 mM	1.0352	1.1174	0.9872	1.0486			1	8.97719
		ɛ=36000 M−1 × cm−1

## Sheet: Spectrum
	Wavelength nm	Absorption
	300	0.418
	301	0.379
	302	0.342
	303	0.306
	304	0.274
	305	0.247
	306	0.223
	307	0.204
	308	0.19
	309	0.18
	310	0.172
	311	0.166
	312	0.161
	313	0.158
	314	0.155
	315	0.153
	316	0.15
	317	0.148
	318	0.147
	319	0.145
	320	0.144
	321	0.142
	322	0.14
	323	0.139
	324	0.138
	325	0.136
	326	0.135
	327	0.134
	328	0.132
	329	0.131
	330	0.13
	331	0.128
	332	0.127
	333	0.125
	334	0.124
	335	0.123
	336	0.122
	337	0.12
	338	0.119
	339	0.118
	340	0.116
	341	0.114
	342	0.113
	343	0.112
	344	0.111
	345	0.11
	346	0.108
	347	0.107
	348	0.106
	349	0.105
	350	0.103
	351	0.102
	352	0.101
	353	0.1
	354	0.099
	355	0.097
	356	0.096
	357	0.094
	358	0.093
	359	0.092
	360	0.091
	361	0.09
	362	0.088
	363	0.087
	364	0.086
	365	0.085
	366	0.083
	367	0.082
	368	0.081
	369	0.08
	370	0.078
	371	0.077
	372	0.076
	373	0.075
	374	0.074
	375	0.073
	376	0.072
	377	0.07
	378	0.069
	379	0.068
	380	0.067
	381	0.066
	382	0.065
	383	0.064
	384	0.063
	385	0.062
	386	0.061
	387	0.06
	388	0.059
	389	0.058
	390	0.058
	391	0.057
	392	0.056
	393	0.055
	394	0.054
	395	0.054
	396	0.053
	397	0.052
	398	0.052
	399	0.051
	400	0.051
	401	0.05
	402	0.049
	403	0.049
	404	0.048
	405	0.048
	406	0.047
	407	0.047
	408	0.046
	409	0.046
	410	0.046
	411	0.045
	412	0.045
	413	0.044
	414	0.044
	415	0.044
	416	0.043
	417	0.043
	418	0.043
	419	0.043
	420	0.042
	421	0.042
	422	0.042
	423	0.042
	424	0.042
	425	0.041
	426	0.041
	427	0.041
	428	0.041
	429	0.041
	430	0.04
	431	0.04
	432	0.04
	433	0.04
	434	0.04
	435	0.039
	436	0.039
	437	0.039
	438	0.039
	439	0.038
	440	0.038
	441	0.038
	442	0.038
	443	0.038
	444	0.037
	445	0.037
	446	0.037
	447	0.037
	448	0.036
	449	0.036
	450	0.036
	451	0.036
	452	0.035
	453	0.035
	454	0.035
	455	0.034
	456	0.034
	457	0.034
	458	0.033
	459	0.033
	460	0.033
	461	0.033
	462	0.033
	463	0.032
	464	0.032
	465	0.032
	466	0.031
	467	0.031
	468	0.031
	469	0.031
	470	0.031
	471	0.031
	472	0.03
	473	0.03
	474	0.03
	475	0.03
	476	0.03
	477	0.03
	478	0.03
	479	0.03
	480	0.03
	481	0.03
	482	0.03
	483	0.03
	484	0.03
	485	0.03
	486	0.03
	487	0.03
	488	0.03
	489	0.03
	490	0.03
	491	0.031
	492	0.031
	493	0.031
	494	0.031
	495	0.032
	496	0.032
	497	0.032
	498	0.032
	499	0.033
	500	0.033
	501	0.034
	502	0.034
	503	0.034
	504	0.035
	505	0.036
	506	0.036
	507	0.037
	508	0.037
	509	0.038
	510	0.038
	511	0.039
	512	0.04
	513	0.041
	514	0.041
	515	0.042
	516	0.043
	517	0.044
	518	0.045
	519	0.045
	520	0.046
	521	0.047
	522	0.048
	523	0.049
	524	0.05
	525	0.051
	526	0.052
	527	0.053
	528	0.054
	529	0.056
	530	0.057
	531	0.058
	532	0.059
	533	0.06
	534	0.062
	535	0.063
	536	0.064
	537	0.066
	538	0.067
	539	0.068
	540	0.07
	541	0.071
	542	0.072
	543	0.074
	544	0.075
	545	0.077
	546	0.078
	547	0.08
	548	0.081
	549	0.083
	550	0.084
	551	0.086
	552	0.087
	553	0.089
	554	0.09
	555	0.092
	556	0.093
	557	0.095
	558	0.097
	559	0.098
	560	0.1
	561	0.101
	562	0.103
	563	0.104
	564	0.106
	565	0.107
	566	0.109
	567	0.11
	568	0.112
	569	0.113
	570	0.114
	571	0.116
	572	0.117
	573	0.119
	574	0.12
	575	0.121
	576	0.122
	577	0.124
	578	0.125
	579	0.126
	580	0.127
	581	0.128
	582	0.129
	583	0.13
	584	0.131
	585	0.132
	586	0.133
	587	0.134
	588	0.134
	589	0.135
	590	0.136
	591	0.136
	592	0.137
	593	0.137
	594	0.137
	595	0.138
	596	0.138
	597	0.138
	598	0.138
	599	0.138
	600	0.138
	601	0.139
	602	0.138
	603	0.138
	604	0.138
	605	0.138
	606	0.138
	607	0.137
	608	0.137
	609	0.136
	610	0.136
	611	0.135
	612	0.135
	613	0.134
	614	0.133
	615	0.132
	616	0.132
	617	0.131
	618	0.13
	619	0.129
	620	0.128
	621	0.127
	622	0.126
	623	0.125
	624	0.124
	625	0.123
	626	0.121
	627	0.12
	628	0.119
	629	0.118
	630	0.116
	631	0.115
	632	0.114
	633	0.112
	634	0.111
	635	0.11
	636	0.108
	637	0.107
	638	0.106
	639	0.104
	640	0.103
	641	0.102
	642	0.1
	643	0.099
	644	0.098
	645	0.096
	646	0.095
	647	0.094
	648	0.093
	649	0.091
	650	0.09
	651	0.089
	652	0.088
	653	0.086
	654	0.085
	655	0.084
	656	0.083
	657	0.081
	658	0.08
	659	0.079
	660	0.078
	661	0.077
	662	0.076
	663	0.075
	664	0.074
	665	0.073
	666	0.072
	667	0.071
	668	0.07
	669	0.069
	670	0.069
	671	0.068
	672	0.067
	673	0.066
	674	0.066
	675	0.065
	676	0.064
	677	0.063
	678	0.063
	679	0.062
	680	0.061
	681	0.061
	682	0.06
	683	0.06
	684	0.059
	685	0.059
	686	0.058
	687	0.058
	688	0.058
	689	0.057
	690	0.057
	691	0.057
	692	0.056
	693	0.056
	694	0.055
	695	0.055
	696	0.055
	697	0.055
	698	0.054
	699	0.054
	700	0.054
	701	0.054
	702	0.053
	703	0.053
	704	0.053
	705	0.053
	706	0.053
	707	0.053
	708	0.052
	709	0.052
	710	0.052
	711	0.052
	712	0.052
	713	0.052
	714	0.052
	715	0.052
	716	0.052
	717	0.052
	718	0.051
	719	0.051
	720	0.051
	721	0.051
	722	0.051
	723	0.051
	724	0.051
	725	0.051
	726	0.051
	727	0.051
	728	0.051
	729	0.051
	730	0.051
	731	0.051
	732	0.051
	733	0.051
	734	0.05
	735	0.05
	736	0.05
	737	0.05
	738	0.05
	739	0.05
	740	0.05
	741	0.05
	742	0.05
	743	0.05
	744	0.05
	745	0.05
	746	0.05
	747	0.05
	748	0.05
	749	0.05
	750	0.05

## Sheet: Substrate specifity
	Substrate	λmax, nm	dA/min/ml	Substrate	λmax, nm	dA/min/ml
	2.6-dimethoxyphenol	469	0,3014; 0,3029; 0,3094; 0,3041	caffeic acid	400	0,0057; 0,0058; 0,0056
	3.5-dimethoxyphenol	-	-	o-coumaric acid	360	+
	3.4.5-trimethoxyphenol	260	0,0099; 0,0097; 0,0102	ferulic acid	420	0,0234; 0,0245; 0,0267
	2-aminophenol	420	0,2636; 0,2596; 0,2626	gallic acid	350	0,0032; 0,0032; 0,0031
	catechol	252	0,0058; 0,0055; 0,0055	gentisic acid	270	0,0069; 0,0065; 0,0066
	guajacol	470	0,0101; 0,0103; 0,0101	syringic acid	300	+
	hydroquinone	289	0,0845; 0,0943; 0,0881	tannic acid	420	0,0007; 0,0010; 0,0008
	pyrogallol	335	0,0633; 0,0564; 0,0512	vanillic acid	340	+
	methylhydroquinone	287	0,125; 0,1267; 0,1241	2-thiobarbituric acid	-	-
	syringaldehyde	276	0,0016; 0,0017; 0,0014	3.4-dihydroxybenzoic acid	350	+
	syringaldazine	330	0,0261; 0,0273; 0,0250	4-hydroxybenzoic acid	-	-
	vanillin	-	-	ABTS	420	1,2608; 1,2347; 1,2376; 1,2557; 1,2533
	tyrosine	-	-	K4[Fe(CN)6]	420	0,0497; 0,0410; 0,0382; 0,0444
